# Supplementary material
Source: HighWire-hosted journal article supplement (https://jnm.snmjournals.org/highwire/filestream/95454/field_highwire_adjunct_files/0/217612_Supplemental_Data.pdf)
Supplement: 217612_Supplemental_Data.pdf [file 217612_Supplemental_Data.pdf]

## Supplemental Definitions: Feature extraction implementation properties

- Programming language: C++, standard 11
- Development environment (IDE): Visual Studio Community 2013, Windows 10, 64bit
- Compiler: VS 2013 in-built, 64bit
- Development status: Active, since 2016
- Feature equation calculations: According to (1,2)
- Neighborhood analysis: 3D, 3x3x3 kernel
- Textural matrix normalization: Yes, according to suggested calculations in (2)
- Textural matrix precision: Float (32bit)
- Radiomics feature precision: Double (64bit)
- Binning: On-the-fly, voxel-by-voxel, based on mapper function
- Binning mapper function: Fixed bin size, variable number of bins per lesion (3)
- Multi-threading applied: Yes, during textural matrix generation
- Multi-threading technology: OpenMP, pre-configured in the IDE
- Multi-threading validation: Yes, compared to single-threading results
- Number of threads: Dynamic, based on max. CPU cores
- Feature extraction validation: Yes, compared to manually calculated features
- Feature extraction validation reference: Own 3D digital phantom

**Supplemental TABLE 1:** Sphere 1 (S<sub>37</sub>) COV matrix of features (rows) and imaging systems (columns) together with their COV across the 12 feature extraction configurations (C). The table rows and columns are ordered by the respective mean COV across imaging sites and features respectively. The imaging system identifiers are numbered by their rank as defined by manuscript TABLE 1. Numeric values are in absolute COV unit (deviation/mean). Color code represents low (green) to high (red) COVs. Color code: COV<5%, (green), 5%≤COV<10% (yellow), 10%≤COV<20% (orange), COV≥20% (pink).

| Feature                       | Feature category | Feature           |                  |                  |                   |                  |                  |                  |                  |                  |                   |                   |                  |                  | Mean RSD |      |
|-------------------------------|------------------|-------------------|------------------|------------------|-------------------|------------------|------------------|------------------|------------------|------------------|-------------------|-------------------|------------------|------------------|----------|------|
|                               |                  | PCS <sub>13</sub> | PCS <sub>7</sub> | PCS <sub>5</sub> | PCS <sub>11</sub> | PCS <sub>6</sub> | PCS <sub>8</sub> | PCS <sub>2</sub> | PCS <sub>1</sub> | PCS <sub>4</sub> | PCS <sub>12</sub> | PCS <sub>10</sub> | PCS <sub>3</sub> | PCS <sub>9</sub> |          |      |
| Information correlation       | GLCM             | 0.00              | 0.00             | 0.00             | 0.00              | 0.00             | 0.00             | 0.00             | 0.00             | 0.00             | 0.00              | 0.00              | 0.00             | 0.00             | 0.00     | 0.00 |
| Compactness                   | Shape            | 0.01              | 0.01             | 0.01             | 0.02              | 0.01             | 0.01             | 0.01             | 0.01             | 0.01             | 0.01              | 0.01              | 0.01             | 0.01             | 0.02     | 0.01 |
| Volume                        | Shape            | 0.01              | 0.01             | 0.02             | 0.01              | 0.01             | 0.01             | 0.01             | 0.01             | 0.06             | 0.06              | 0.00              | 0.01             | 0.00             | 0.01     | 0.02 |
| Spherical dice coefficient    | Shape            | 0.11              | 0.01             | 0.04             | 0.01              | 0.01             | 0.03             | 0.01             | 0.04             | 0.02             | 0.02              | 0.01              | 0.04             | 0.02             | 0.02     | 0.03 |
| Correlation                   | GLCM             | 0.21              | 0.14             | 0.14             | 0.20              | 0.15             | 0.14             | 0.13             | 0.13             | 0.12             | 0.10              | 0.09              | 0.09             | 0.19             | 0.14     | 0.14 |
| Sum entropy                   | GLCM             | 0.17              | 0.16             | 0.16             | 0.17              | 0.16             | 0.16             | 0.17             | 0.17             | 0.17             | 0.17              | 0.17              | 0.18             | 0.16             | 0.17     | 0.17 |
| Entropy                       | GLCM             | 0.18              | 0.17             | 0.17             | 0.19              | 0.18             | 0.19             | 0.20             | 0.20             | 0.20             | 0.21              | 0.21              | 0.22             | 0.18             | 0.19     | 0.19 |
| Small zone size emphasis      | GLZSM            | 0.19              | 0.21             | 0.19             | 0.22              | 0.22             | 0.24             | 0.28             | 0.30             | 0.32             | 0.33              | 0.35              | 0.35             | 0.20             | 0.26     | 0.26 |
| Difference entropy            | GLCM             | 0.28              | 0.29             | 0.28             | 0.29              | 0.29             | 0.30             | 0.31             | 0.32             | 0.32             | 0.33              | 0.34              | 0.36             | 0.29             | 0.31     | 0.31 |
| Zone size percentage          | GLZSM            | 0.43              | 0.44             | 0.42             | 0.46              | 0.46             | 0.50             | 0.54             | 0.56             | 0.58             | 0.61              | 0.68              | 0.72             | 0.45             | 0.53     | 0.53 |
| Inverse difference            | GLCM             | 0.56              | 0.61             | 0.60             | 0.57              | 0.59             | 0.58             | 0.58             | 0.57             | 0.56             | 0.56              | 0.55              | 0.56             | 0.58             | 0.57     | 0.57 |
| Coarseness                    | NGTDM            | 0.64              | 0.57             | 0.56             | 0.64              | 0.56             | 0.58             | 0.59             | 0.56             | 0.56             | 0.58              | 0.60              | 0.63             | 0.62             | 0.59     | 0.59 |
| Inverse difference moment     | GLCM             | 0.74              | 0.83             | 0.82             | 0.76              | 0.81             | 0.78             | 0.79             | 0.77             | 0.76             | 0.76              | 0.76              | 0.77             | 0.79             | 0.78     | 0.78 |
| Sum average                   | GLCM             | 0.83              | 0.83             | 0.83             | 0.83              | 0.83             | 0.83             | 0.83             | 0.83             | 0.83             | 0.83              | 0.83              | 0.83             | 0.83             | 0.83     | 0.83 |
| Dissimilarity                 | GLCM             | 1.04              | 1.08             | 1.07             | 1.05              | 1.07             | 1.07             | 1.07             | 1.06             | 1.06             | 1.08              | 1.08              | 1.08             | 1.05             | 1.07     | 1.07 |
| Small zone low gray emphasis  | GLZSM            | 1.19              | 0.94             | 1.15             | 1.23              | 1.28             | 1.04             | 1.10             | 0.98             | 1.04             | 1.01              | 1.19              | 1.37             | 1.02             | 1.12     | 1.12 |
| Maximum probability           | GLCM             | 1.16              | 1.19             | 1.18             | 1.19              | 1.21             | 1.13             | 1.13             | 1.27             | 1.08             | 1.17              | 1.35              | 1.39             | 1.14             | 1.20     | 1.20 |
| Low gray level zone emphasis  | GLZSM            | 1.12              | 0.98             | 1.04             | 1.15              | 1.18             | 1.09             | 1.22             | 1.26             | 1.42             | 1.22              | 1.30              | 1.67             | 1.01             | 1.20     | 1.20 |
| Auto correlation              | GLCM             | 1.35              | 1.35             | 1.35             | 1.35              | 1.35             | 1.35             | 1.35             | 1.35             | 1.35             | 1.35              | 1.36              | 1.35             | 1.35             | 1.35     | 1.35 |
| Sum of squares variance       | GLCM             | 1.35              | 1.36             | 1.35             | 1.35              | 1.35             | 1.35             | 1.35             | 1.35             | 1.35             | 1.35              | 1.35              | 1.35             | 1.35             | 1.35     | 1.35 |
| Sum variance                  | GLCM             | 1.36              | 1.35             | 1.35             | 1.36              | 1.35             | 1.35             | 1.35             | 1.35             | 1.35             | 1.35              | 1.35              | 1.35             | 1.36             | 1.35     | 1.35 |
| Angular second moment         | GLCM             | 1.26              | 1.34             | 1.35             | 1.28              | 1.36             | 1.35             | 1.37             | 1.36             | 1.35             | 1.41              | 1.42              | 1.44             | 1.30             | 1.35     | 1.35 |
| High gray level zone emphasis | GLZSM            | 1.40              | 1.37             | 1.37             | 1.40              | 1.37             | 1.37             | 1.37             | 1.38             | 1.37             | 1.33              | 1.33              | 1.32             | 1.38             | 1.37     | 1.37 |
| Small zone high gray emphasis | GLZSM            | 1.43              | 1.41             | 1.41             | 1.43              | 1.41             | 1.41             | 1.42             | 1.43             | 1.43             | 1.39              | 1.41              | 1.40             | 1.42             | 1.42     | 1.42 |
| Texture strength              | NGTDM            | 1.59              | 1.52             | 1.54             | 1.60              | 1.56             | 1.51             | 1.60             | 1.60             | 1.60             | 1.56              | 1.56              | 1.54             | 1.56             | 1.56     | 1.56 |
| Cluster prominence            | GLCM             | 1.69              | 1.68             | 1.68             | 1.69              | 1.68             | 1.68             | 1.68             | 1.68             | 1.68             | 1.68              | 1.68              | 1.68             | 1.69             | 1.68     | 1.68 |
| Contrast                      | NGTDM            | 1.74              | 1.85             | 1.83             | 1.68              | 1.72             | 1.76             | 1.64             | 1.58             | 1.59             | 1.62              | 1.59              | 1.61             | 1.74             | 1.69     | 1.69 |
| Zone size non-uniformity      | GLZSM            | 1.70              | 1.56             | 1.70             | 1.72              | 1.60             | 1.75             | 1.65             | 1.77             | 1.71             | 1.73              | 1.75              | 1.71             | 1.81             | 1.70     | 1.70 |
| Busyness                      | NGTDM            | 1.61              | 1.62             | 1.64             | 1.60              | 1.60             | 1.67             | 1.71             | 1.72             | 1.77             | 1.86              | 2.00              | 2.08             | 1.63             | 1.73     | 1.73 |
| Contrast                      | GLCM             | 1.96              | 2.05             | 2.04             | 1.99              | 2.03             | 2.04             | 2.04             | 2.01             | 2.02             | 2.06              | 2.06              | 2.06             | 1.98             | 2.03     | 2.03 |
| Difference variance           | GLCM             | 1.97              | 2.05             | 2.05             | 2.00              | 2.03             | 2.04             | 2.05             | 2.02             | 2.03             | 2.05              | 2.05              | 2.06             | 1.99             | 2.03     | 2.03 |
| Gray level non-uniformity     | GLZSM            | 1.97              | 2.03             | 2.00             | 2.00              | 2.04             | 2.09             | 2.12             | 2.11             | 2.14             | 2.21              | 2.27              | 2.32             | 2.03             | 2.10     | 2.10 |
| Complexity                    | NGTDM            | 2.01              | 2.10             | 2.10             | 2.06              | 2.14             | 2.09             | 2.16             | 2.15             | 2.16             | 2.21              | 2.20              | 2.15             | 2.02             | 2.12     | 2.12 |
| Large zone high gray emphasis | GLZSM            | 2.19              | 2.41             | 2.24             | 2.40              | 2.49             | 2.79             | 3.08             | 3.11             | 3.14             | 3.13              | 3.18              | 3.12             | 2.50             | 2.75     | 2.75 |
| Large zone size emphasis      | GLZSM            | 3.06              | 3.23             | 3.20             | 3.13              | 3.23             | 3.27             | 3.30             | 3.30             | 3.30             | 3.27              | 3.27              | 3.24             | 3.19             | 3.23     | 3.23 |
| Large zone low gray Emphasis  | GLZSM            | 3.24              | 3.30             | 3.29             | 3.28              | 3.30             | 3.30             | 3.31             | 3.31             | 3.31             | 3.28              | 3.29              | 3.27             | 3.29             | 3.29     | 3.29 |
| Cluster shade                 | GLCM             | 1.65              | 1.68             | 1.67             | 1.88              | 1.69             | 1.65             | 1.62             | 1.59             | 1.59             | 1.60              | 1.60              | 1.60             | 26.44            | 3.56     | 3.56 |
| Mean RSD                      |                  | 1.17              | 1.18             | 1.18             | 1.19              | 1.20             | 1.20             | 1.22             | 1.22             | 1.23             | 1.23              | 1.25              | 1.27             | 1.85             |          |      |

**Supplemental TABLE 2:** Sphere 2 (S<sub>28</sub>) COV matrix of features (rows) and imaging systems (columns) together with their COV across the 12 feature extraction configurations (C). The table rows and columns are ordered by the respective mean COV across imaging sites and features respectively. The imaging system identifiers are numbered by their rank as defined by manuscript TABLE 1. Numeric values are in absolute COV unit (deviation/mean). Color code represents low (green) to high (red) COVs. Color code: COV<5%, (green), 5%≤COV<10% (yellow), 10%≤COV<20% (orange), COV≥20% (pink).

| Feature                       | Feature category | Feature           |                   |                  |                  |                  |                  |                  |                  |                  |                  |                   |                  | Mean RSD |                   |
|-------------------------------|------------------|-------------------|-------------------|------------------|------------------|------------------|------------------|------------------|------------------|------------------|------------------|-------------------|------------------|----------|-------------------|
|                               |                  | PCS <sub>13</sub> | PCS <sub>11</sub> | PCS <sub>9</sub> | PCS <sub>5</sub> | PCS <sub>6</sub> | PCS <sub>7</sub> | PCS <sub>8</sub> | PCS <sub>1</sub> | PCS <sub>2</sub> | PCS <sub>4</sub> | PCS <sub>12</sub> | PCS <sub>3</sub> |          | PCS <sub>10</sub> |
| Information correlation       | GLCM             | 0.00              | 0.00              | 0.00             | 0.00             | 0.00             | 0.00             | 0.00             | 0.00             | 0.00             | 0.00             | 0.00              | 0.00             | 0.00     | 0.00              |
| Compactness                   | Shape            | 0.02              | 0.02              | 0.02             | 0.02             | 0.02             | 0.02             | 0.02             | 0.02             | 0.01             | 0.02             | 0.02              | 0.01             | 0.02     | 0.01              |
| Volume                        | Shape            | 0.00              | 0.01              | 0.02             | 0.03             | 0.02             | 0.03             | 0.01             | 0.08             | 0.02             | 0.08             | 0.01              | 0.00             | 0.00     | 0.02              |
| Spherical dice coefficient    | Shape            | 0.10              | 0.02              | 0.03             | 0.03             | 0.01             | 0.01             | 0.03             | 0.01             | 0.00             | 0.02             | 0.04              | 0.03             | 0.03     | 0.03              |
| Sum entropy                   | GLCM             | 0.16              | 0.16              | 0.16             | 0.16             | 0.16             | 0.16             | 0.16             | 0.17             | 0.17             | 0.18             | 0.18              | 0.19             | 0.18     | 0.17              |
| Correlation                   | GLCM             | 0.26              | 0.24              | 0.24             | 0.17             | 0.17             | 0.18             | 0.17             | 0.17             | 0.17             | 0.16             | 0.14              | 0.13             | 0.13     | 0.18              |
| Entropy                       | GLCM             | 0.17              | 0.17              | 0.17             | 0.17             | 0.17             | 0.18             | 0.18             | 0.19             | 0.19             | 0.20             | 0.21              | 0.24             | 0.22     | 0.19              |
| Small zone size emphasis      | GLZSM            | 0.21              | 0.20              | 0.22             | 0.23             | 0.22             | 0.24             | 0.24             | 0.31             | 0.28             | 0.31             | 0.33              | 0.36             | 0.33     | 0.27              |
| Difference entropy            | GLCM             | 0.28              | 0.28              | 0.29             | 0.29             | 0.29             | 0.29             | 0.30             | 0.31             | 0.32             | 0.33             | 0.33              | 0.37             | 0.35     | 0.31              |
| Zone size percentage          | GLZSM            | 0.41              | 0.40              | 0.45             | 0.44             | 0.44             | 0.47             | 0.48             | 0.54             | 0.55             | 0.58             | 0.63              | 0.78             | 0.68     | 0.53              |
| Coarseness                    | NGTDM            | 0.58              | 0.62              | 0.59             | 0.58             | 0.54             | 0.55             | 0.57             | 0.53             | 0.58             | 0.55             | 0.60              | 0.65             | 0.61     | 0.58              |
| Inverse difference            | GLCM             | 0.61              | 0.61              | 0.60             | 0.62             | 0.61             | 0.60             | 0.60             | 0.59             | 0.60             | 0.58             | 0.57              | 0.54             | 0.56     | 0.59              |
| Inverse difference moment     | GLCM             | 0.84              | 0.83              | 0.83             | 0.85             | 0.85             | 0.82             | 0.81             | 0.82             | 0.83             | 0.81             | 0.79              | 0.74             | 0.77     | 0.81              |
| Sum average                   | GLCM             | 0.83              | 0.83              | 0.83             | 0.83             | 0.83             | 0.83             | 0.83             | 0.83             | 0.83             | 0.83             | 0.83              | 0.84             | 0.83     | 0.83              |
| Dissimilarity                 | GLCM             | 1.05              | 1.05              | 1.06             | 1.07             | 1.07             | 1.06             | 1.08             | 1.06             | 1.07             | 1.06             | 1.09              | 1.09             | 1.10     | 1.07              |
| Small zone low gray emphasis  | GLZSM            | 1.10              | 1.18              | 0.91             | 1.03             | 1.07             | 1.19             | 1.15             | 1.01             | 0.91             | 1.07             | 1.07              | 1.25             | 1.37     | 1.10              |
| Low gray level zone emphasis  | GLZSM            | 1.05              | 1.10              | 0.94             | 0.97             | 1.04             | 1.12             | 1.11             | 1.17             | 1.17             | 1.27             | 1.30              | 1.35             | 1.65     | 1.17              |
| Maximum probability           | GLCM             | 1.04              | 1.09              | 1.00             | 1.18             | 1.22             | 1.16             | 1.26             | 1.15             | 1.24             | 1.19             | 1.26              | 1.37             | 1.36     | 1.19              |
| High gray level zone emphasis | GLZSM            | 1.37              | 1.37              | 1.36             | 1.34             | 1.34             | 1.34             | 1.34             | 1.35             | 1.34             | 1.33             | 1.30              | 1.28             | 1.30     | 1.34              |
| Angular second moment         | GLCM             | 1.21              | 1.25              | 1.28             | 1.33             | 1.33             | 1.34             | 1.38             | 1.32             | 1.33             | 1.33             | 1.43              | 1.42             | 1.44     | 1.34              |
| Auto correlation              | GLCM             | 1.35              | 1.35              | 1.35             | 1.35             | 1.35             | 1.35             | 1.35             | 1.35             | 1.35             | 1.35             | 1.35              | 1.35             | 1.35     | 1.35              |
| Sum of squares variance       | GLCM             | 1.35              | 1.35              | 1.35             | 1.35             | 1.35             | 1.35             | 1.35             | 1.35             | 1.35             | 1.35             | 1.35              | 1.36             | 1.36     | 1.35              |
| Sum variance                  | GLCM             | 1.36              | 1.36              | 1.35             | 1.35             | 1.35             | 1.35             | 1.35             | 1.35             | 1.35             | 1.35             | 1.35              | 1.35             | 1.35     | 1.35              |
| Small zone high gray emphasis | GLZSM            | 1.40              | 1.41              | 1.41             | 1.38             | 1.38             | 1.38             | 1.38             | 1.41             | 1.40             | 1.39             | 1.37              | 1.39             | 1.38     | 1.39              |
| Texture strength              | NGTDM            | 1.38              | 1.42              | 1.38             | 1.35             | 1.36             | 1.36             | 1.37             | 1.46             | 1.40             | 1.40             | 1.44              | 1.44             | 1.38     | 1.39              |
| Cluster shade                 | GLCM             | 1.72              | 1.74              | 1.68             | 1.60             | 1.60             | 1.61             | 1.60             | 1.59             | 1.60             | 1.59             | 1.61              | 1.60             | 1.59     | 1.63              |
| Cluster prominence            | GLCM             | 1.70              | 1.69              | 1.68             | 1.68             | 1.69             | 1.69             | 1.68             | 1.68             | 1.69             | 1.68             | 1.69              | 1.68             | 1.68     | 1.69              |
| Zone size non-uniformity      | GLZSM            | 1.59              | 1.62              | 1.57             | 1.63             | 1.68             | 1.66             | 1.50             | 1.54             | 2.02             | 2.20             | 1.93              | 2.09             | 1.86     | 1.76              |
| Busyness                      | NGTDM            | 1.60              | 1.57              | 1.62             | 1.82             | 1.75             | 1.68             | 1.75             | 1.79             | 1.77             | 1.77             | 1.93              | 2.12             | 2.04     | 1.79              |
| Complexity                    | NGTDM            | 1.77              | 1.84              | 1.82             | 1.79             | 1.83             | 1.82             | 1.87             | 1.93             | 1.89             | 1.85             | 1.96              | 1.97             | 1.92     | 1.86              |
| Contrast                      | GLCM             | 1.98              | 2.00              | 2.02             | 2.04             | 2.03             | 2.02             | 2.06             | 2.02             | 2.03             | 2.01             | 2.07              | 2.07             | 2.09     | 2.03              |
| Difference variance           | GLCM             | 1.98              | 2.00              | 2.02             | 2.05             | 2.03             | 2.03             | 2.06             | 2.04             | 2.04             | 2.04             | 2.06              | 2.07             | 2.09     | 2.04              |
| Contrast                      | NGTDM            | 2.31              | 2.16              | 2.22             | 2.25             | 2.22             | 2.15             | 2.18             | 1.96             | 2.05             | 2.00             | 1.96              | 1.83             | 2.00     | 2.10              |
| Gray level non-uniformity     | GLZSM            | 2.00              | 1.98              | 2.04             | 2.05             | 2.06             | 2.08             | 2.10             | 2.12             | 2.15             | 2.17             | 2.22              | 2.36             | 2.28     | 2.12              |
| Large zone high gray emphasis | GLZSM            | 2.01              | 1.89              | 2.38             | 2.18             | 2.17             | 2.59             | 2.57             | 3.12             | 3.16             | 3.18             | 3.19              | 2.87             | 3.17     | 2.65              |
| Large zone size emphasis      | GLZSM            | 3.18              | 3.17              | 3.24             | 3.27             | 3.26             | 3.27             | 3.27             | 3.30             | 3.29             | 3.28             | 3.25              | 3.13             | 3.24     | 3.24              |
| Large zone low gray Emphasis  | GLZSM            | 3.25              | 3.27              | 3.29             | 3.29             | 3.28             | 3.28             | 3.28             | 3.31             | 3.30             | 3.29             | 3.27              | 3.23             | 3.28     | 3.28              |
| Mean RSD                      |                  | 1.17              | 1.17              | 1.17             | 1.18             | 1.18             | 1.20             | 1.20             | 1.21             | 1.23             | 1.24             | 1.25              | 1.26             | 1.27     |                   |

**Supplemental TABLE 3:** Sphere 3 (S<sub>22</sub>) COV matrix of features (rows) and imaging systems (columns) together with their COV across the 12 feature extraction configurations (C). The table rows and columns are ordered by the respective mean COV across imaging sites and features respectively. The imaging system identifiers are numbered by their rank as defined by manuscript TABLE 1. Numeric values are in absolute COV unit (deviation/mean). Color code represents low (green) to high (red) COVs. Color code: COV<5%, (green), 5%≤COV<10% (yellow), 10%≤COV<20% (orange), COV≥20% (pink).

| Feature                       | Feature category | Feature           |                  |                   |                  |                  |                  |                  |                  |                  |                   |                  |                  | Mean RSD |                   |
|-------------------------------|------------------|-------------------|------------------|-------------------|------------------|------------------|------------------|------------------|------------------|------------------|-------------------|------------------|------------------|----------|-------------------|
|                               |                  | PCS <sub>13</sub> | PCS <sub>5</sub> | PCS <sub>11</sub> | PCS <sub>8</sub> | PCS <sub>6</sub> | PCS <sub>9</sub> | PCS <sub>7</sub> | PCS <sub>4</sub> | PCS <sub>1</sub> | PCS <sub>12</sub> | PCS <sub>2</sub> | PCS <sub>3</sub> |          | PCS <sub>10</sub> |
| Information correlation       | GLCM             | 0.00              | 0.00             | 0.00              | 0.00             | 0.00             | 0.00             | 0.00             | 0.00             | 0.00             | 0.00              | 0.00             | 0.00             | 0.00     | 0.00              |
| Compactness                   | Shape            | 0.03              | 0.02             | 0.01              | 0.02             | 0.02             | 0.03             | 0.02             | 0.02             | 0.02             | 0.02              | 0.02             | 0.02             | 0.02     | 0.02              |
| Volume                        | Shape            | 0.03              | 0.03             | 0.01              | 0.02             | 0.01             | 0.02             | 0.02             | 0.10             | 0.09             | 0.02              | 0.02             | 0.01             | 0.02     | 0.03              |
| Spherical dice coefficient    | Shape            | 0.15              | 0.04             | 0.14              | 0.03             | 0.04             | 0.12             | 0.08             | 0.03             | 0.02             | 0.03              | 0.09             | 0.08             | 0.03     | 0.07              |
| Sum entropy                   | GLCM             | 0.16              | 0.16             | 0.16              | 0.17             | 0.17             | 0.17             | 0.17             | 0.18             | 0.18             | 0.18              | 0.18             | 0.20             | 0.20     | 0.18              |
| Entropy                       | GLCM             | 0.17              | 0.17             | 0.17              | 0.18             | 0.18             | 0.18             | 0.18             | 0.20             | 0.20             | 0.22              | 0.20             | 0.25             | 0.24     | 0.19              |
| Correlation                   | GLCM             | 0.33              | 0.21             | 0.27              | 0.22             | 0.23             | 0.27             | 0.22             | 0.21             | 0.21             | 0.17              | 0.22             | 0.18             | 0.17     | 0.22              |
| Small zone size emphasis      | GLZSM            | 0.22              | 0.22             | 0.22              | 0.24             | 0.23             | 0.24             | 0.24             | 0.33             | 0.32             | 0.28              | 0.29             | 0.42             | 0.37     | 0.28              |
| Difference entropy            | GLCM             | 0.28              | 0.29             | 0.28              | 0.30             | 0.30             | 0.29             | 0.29             | 0.33             | 0.32             | 0.34              | 0.32             | 0.39             | 0.37     | 0.32              |
| Zone size percentage          | GLZSM            | 0.41              | 0.45             | 0.42              | 0.50             | 0.48             | 0.47             | 0.48             | 0.60             | 0.59             | 0.67              | 0.57             | 0.87             | 0.79     | 0.56              |
| Inverse difference            | GLCM             | 0.61              | 0.59             | 0.61              | 0.59             | 0.60             | 0.61             | 0.62             | 0.57             | 0.57             | 0.55              | 0.58             | 0.51             | 0.53     | 0.58              |
| Coarseness                    | NGTDM            | 0.61              | 0.58             | 0.61              | 0.52             | 0.53             | 0.61             | 0.55             | 0.55             | 0.56             | 0.60              | 0.59             | 0.68             | 0.62     | 0.59              |
| Inverse difference moment     | GLCM             | 0.83              | 0.81             | 0.83              | 0.81             | 0.82             | 0.84             | 0.85             | 0.79             | 0.79             | 0.75              | 0.81             | 0.70             | 0.72     | 0.80              |
| Sum average                   | GLCM             | 0.83              | 0.83             | 0.83              | 0.83             | 0.83             | 0.83             | 0.83             | 0.83             | 0.83             | 0.83              | 0.83             | 0.83             | 0.83     | 0.83              |
| Dissimilarity                 | GLCM             | 1.07              | 1.07             | 1.07              | 1.09             | 1.08             | 1.06             | 1.08             | 1.05             | 1.05             | 1.09              | 1.08             | 1.08             | 1.09     | 1.07              |
| Small zone low gray emphasis  | GLZSM            | 0.96              | 0.92             | 1.27              | 1.18             | 1.10             | 1.10             | 1.20             | 0.87             | 0.96             | 1.19              | 1.29             | 1.15             | 1.13     | 1.10              |
| Low gray level zone emphasis  | GLZSM            | 0.91              | 0.98             | 1.14              | 1.12             | 1.08             | 1.06             | 1.08             | 1.23             | 1.13             | 1.22              | 1.49             | 1.30             | 1.36     | 1.16              |
| Maximum probability           | GLCM             | 1.02              | 1.19             | 1.05              | 1.20             | 1.10             | 1.13             | 1.26             | 1.16             | 1.22             | 1.27              | 1.22             | 1.36             | 1.32     | 1.19              |
| Texture strength              | NGTDM            | 1.28              | 1.24             | 1.29              | 1.27             | 1.26             | 1.31             | 1.26             | 1.31             | 1.28             | 1.28              | 1.30             | 1.35             | 1.35     | 1.29              |
| High gray level zone emphasis | GLZSM            | 1.35              | 1.30             | 1.34              | 1.29             | 1.31             | 1.33             | 1.32             | 1.31             | 1.31             | 1.26              | 1.31             | 1.26             | 1.26     | 1.30              |
| Angular second moment         | GLCM             | 1.14              | 1.32             | 1.24              | 1.30             | 1.32             | 1.28             | 1.33             | 1.33             | 1.33             | 1.41              | 1.35             | 1.38             | 1.41     | 1.32              |
| Auto correlation              | GLCM             | 1.35              | 1.35             | 1.35              | 1.35             | 1.35             | 1.35             | 1.35             | 1.36             | 1.36             | 1.35              | 1.35             | 1.35             | 1.35     | 1.35              |
| Sum variance                  | GLCM             | 1.36              | 1.35             | 1.35              | 1.35             | 1.35             | 1.35             | 1.35             | 1.35             | 1.35             | 1.35              | 1.35             | 1.35             | 1.35     | 1.35              |
| Sum of squares variance       | GLCM             | 1.36              | 1.35             | 1.35              | 1.36             | 1.35             | 1.35             | 1.35             | 1.35             | 1.35             | 1.36              | 1.36             | 1.35             | 1.35     | 1.35              |
| Small zone high gray emphasis | GLZSM            | 1.39              | 1.35             | 1.38              | 1.34             | 1.35             | 1.37             | 1.37             | 1.38             | 1.38             | 1.34              | 1.37             | 1.38             | 1.36     | 1.37              |
| Cluster shade                 | GLCM             | 1.68              | 1.60             | 1.66              | 1.59             | 1.61             | 1.64             | 1.60             | 1.59             | 1.59             | 1.60              | 1.60             | 1.60             | 1.60     | 1.61              |
| Cluster prominence            | GLCM             | 1.71              | 1.69             | 1.70              | 1.68             | 1.69             | 1.70             | 1.69             | 1.68             | 1.68             | 1.69              | 1.69             | 1.69             | 1.69     | 1.69              |
| Complexity                    | NGTDM            | 1.67              | 1.65             | 1.70              | 1.69             | 1.68             | 1.71             | 1.69             | 1.72             | 1.71             | 1.77              | 1.72             | 1.86             | 1.83     | 1.72              |
| Busyness                      | NGTDM            | 1.80              | 1.64             | 1.66              | 1.64             | 1.62             | 1.69             | 1.68             | 1.75             | 1.76             | 1.94              | 1.78             | 2.10             | 2.05     | 1.78              |
| Zone size non-uniformity      | GLZSM            | 1.51              | 1.71             | 1.63              | 1.76             | 1.95             | 1.71             | 1.75             | 2.09             | 2.30             | 1.99              | 1.98             | 2.23             | 2.31     | 1.92              |
| Contrast                      | GLCM             | 2.03              | 2.03             | 2.03              | 2.07             | 2.06             | 2.01             | 2.05             | 2.00             | 2.00             | 2.06              | 2.06             | 2.06             | 2.06     | 2.04              |
| Difference variance           | GLCM             | 2.03              | 2.04             | 2.03              | 2.08             | 2.06             | 2.01             | 2.06             | 2.04             | 2.03             | 2.06              | 2.07             | 2.07             | 2.06     | 2.05              |
| Gray level non-uniformity     | GLZSM            | 2.03              | 2.09             | 2.05              | 2.12             | 2.12             | 2.09             | 2.10             | 2.20             | 2.19             | 2.27              | 2.19             | 2.40             | 2.34     | 2.17              |
| Contrast                      | NGTDM            | 2.64              | 2.44             | 2.59              | 2.44             | 2.50             | 2.44             | 2.42             | 2.21             | 2.25             | 2.20              | 2.34             | 1.98             | 2.04     | 2.35              |
| Large zone high gray emphasis | GLZSM            | 1.44              | 1.91             | 1.84              | 2.39             | 2.43             | 2.60             | 2.46             | 3.14             | 3.17             | 3.10              | 3.11             | 2.61             | 2.95     | 2.55              |
| Large zone size emphasis      | GLZSM            | 3.20              | 3.22             | 3.24              | 3.22             | 3.23             | 3.27             | 3.26             | 3.26             | 3.28             | 3.22              | 3.26             | 3.03             | 3.16     | 3.22              |
| Large zone low gray Emphasis  | GLZSM            | 3.26              | 3.24             | 3.26              | 3.24             | 3.25             | 3.28             | 3.28             | 3.29             | 3.29             | 3.27              | 3.28             | 3.19             | 3.24     | 3.26              |
| Mean RSD                      |                  | 1.16              | 1.16             | 1.18              | 1.19             | 1.20             | 1.20             | 1.20             | 1.23             | 1.23             | 1.24              | 1.25             | 1.25             | 1.26     |                   |

**Supplemental TABLE 4:** Sphere 4 (S<sub>17</sub>) COV matrix of features (rows) and imaging systems (columns) together with their COV across the 12 feature extraction configurations (C). The table rows and columns are ordered by the respective mean COV across imaging sites and features respectively. The imaging system identifiers are numbered by their rank as defined by manuscript TABLE 1. Numeric values are in absolute COV unit (deviation/mean). Color code represents low (green) to high (red) COVs. Color code: COV<5%, (green), 5%≤COV<10% (yellow), 10%≤COV<20% (orange), COV≥20% (pink).

| Feature                       | Feature category | Feature           |                   |                  |                  |                  |                  |                  |                  |                   |                  |                  |                  | Mean              |      |
|-------------------------------|------------------|-------------------|-------------------|------------------|------------------|------------------|------------------|------------------|------------------|-------------------|------------------|------------------|------------------|-------------------|------|
|                               |                  | PCS <sub>11</sub> | PCS <sub>13</sub> | PCS <sub>6</sub> | PCS <sub>5</sub> | PCS <sub>9</sub> | PCS <sub>1</sub> | PCS <sub>2</sub> | PCS <sub>7</sub> | PCS <sub>12</sub> | PCS <sub>8</sub> | PCS <sub>3</sub> | PCS <sub>2</sub> | PCS <sub>10</sub> | RSD  |
| Information correlation       | GLCM             | 0.00              | 0.00              | 0.00             | 0.00             | 0.00             | 0.00             | 0.00             | 0.00             | 0.00              | 0.00             | 0.00             | 0.00             | 0.00              | 0.00 |
| Compactness                   | Shape            | 0.03              | 0.04              | 0.02             | 0.03             | 0.03             | 0.02             | 0.02             | 0.02             | 0.02              | 0.03             | 0.02             | 0.02             | 0.02              | 0.03 |
| Volume                        | Shape            | 0.02              | 0.01              | 0.02             | 0.04             | 0.03             | 0.11             | 0.11             | 0.03             | 0.01              | 0.01             | 0.01             | 0.04             | 0.01              | 0.03 |
| Spherical dice coefficient    | Shape            | 0.07              | 0.16              | 0.11             | 0.04             | 0.10             | 0.06             | 0.09             | 0.14             | 0.11              | 0.14             | 0.05             | 0.07             | 0.10              | 0.10 |
| Sum entropy                   | GLCM             | 0.16              | 0.17              | 0.17             | 0.17             | 0.18             | 0.18             | 0.21             | 0.17             | 0.20              | 0.18             | 0.24             | 0.19             | 0.22              | 0.19 |
| Entropy                       | GLCM             | 0.17              | 0.18              | 0.17             | 0.19             | 0.19             | 0.20             | 0.24             | 0.19             | 0.23              | 0.19             | 0.29             | 0.22             | 0.26              | 0.21 |
| Correlation                   | GLCM             | 0.36              | 0.40              | 0.29             | 0.28             | 0.36             | 0.26             | 0.28             | 0.29             | 0.22              | 0.30             | 0.23             | 0.29             | 0.21              | 0.29 |
| Small zone size emphasis      | GLZSM            | 0.18              | 0.22              | 0.22             | 0.23             | 0.24             | 0.28             | 0.41             | 0.25             | 0.30              | 0.26             | 0.46             | 0.34             | 0.43              | 0.29 |
| Difference entropy            | GLCM             | 0.26              | 0.28              | 0.29             | 0.30             | 0.30             | 0.32             | 0.37             | 0.31             | 0.35              | 0.31             | 0.43             | 0.34             | 0.40              | 0.33 |
| Inverse difference            | GLCM             | 0.61              | 0.60              | 0.61             | 0.57             | 0.60             | 0.56             | 0.54             | 0.58             | 0.53              | 0.58             | 0.49             | 0.54             | 0.50              | 0.56 |
| Coarseness                    | NGTDM            | 0.54              | 0.60              | 0.56             | 0.57             | 0.58             | 0.54             | 0.59             | 0.53             | 0.62              | 0.58             | 0.73             | 0.58             | 0.69              | 0.59 |
| Zone size percentage          | GLZSM            | 0.38              | 0.45              | 0.46             | 0.52             | 0.51             | 0.57             | 0.74             | 0.54             | 0.73              | 0.55             | 0.99             | 0.66             | 0.91              | 0.62 |
| Inverse difference moment     | GLCM             | 0.82              | 0.82              | 0.84             | 0.78             | 0.82             | 0.76             | 0.74             | 0.79             | 0.71              | 0.80             | 0.65             | 0.74             | 0.66              | 0.76 |
| Sum average                   | GLCM             | 0.83              | 0.83              | 0.83             | 0.83             | 0.84             | 0.83             | 0.84             | 0.83             | 0.83              | 0.83             | 0.85             | 0.83             | 0.84              | 0.83 |
| Dissimilarity                 | GLCM             | 1.08              | 1.09              | 1.09             | 1.07             | 1.08             | 1.07             | 1.06             | 1.10             | 1.08              | 1.08             | 1.09             | 1.09             | 1.09              | 1.08 |
| Low gray level zone emphasis  | GLZSM            | 1.25              | 0.83              | 1.00             | 0.96             | 0.93             | 1.03             | 1.17             | 1.19             | 1.07              | 1.07             | 1.27             | 1.15             | 1.26              | 1.09 |
| Small zone low gray emphasis  | GLZSM            | 1.24              | 0.68              | 1.10             | 1.02             | 0.96             | 0.96             | 1.08             | 1.27             | 0.84              | 1.21             | 1.16             | 1.29             | 1.66              | 1.11 |
| Maximum probability           | GLCM             | 1.01              | 1.13              | 1.18             | 1.15             | 1.22             | 1.15             | 1.26             | 1.26             | 1.21              | 1.26             | 1.33             | 1.23             | 1.30              | 1.21 |
| Texture strength              | NGTDM            | 1.22              | 1.18              | 1.21             | 1.22             | 1.22             | 1.24             | 1.31             | 1.24             | 1.28              | 1.25             | 1.39             | 1.26             | 1.35              | 1.26 |
| High gray level zone emphasis | GLZSM            | 1.31              | 1.30              | 1.29             | 1.28             | 1.30             | 1.29             | 1.29             | 1.29             | 1.24              | 1.28             | 1.26             | 1.29             | 1.24              | 1.28 |
| Angular second moment         | GLCM             | 1.13              | 1.18              | 1.30             | 1.31             | 1.32             | 1.29             | 1.37             | 1.34             | 1.36              | 1.35             | 1.39             | 1.30             | 1.39              | 1.31 |
| Small zone high gray emphasis | GLZSM            | 1.34              | 1.34              | 1.32             | 1.33             | 1.35             | 1.35             | 1.39             | 1.35             | 1.32              | 1.33             | 1.41             | 1.37             | 1.35              | 1.35 |
| Sum variance                  | GLCM             | 1.35              | 1.35              | 1.35             | 1.35             | 1.36             | 1.35             | 1.36             | 1.35             | 1.36              | 1.35             | 1.36             | 1.35             | 1.36              | 1.36 |
| Auto correlation              | GLCM             | 1.35              | 1.35              | 1.35             | 1.35             | 1.35             | 1.36             | 1.36             | 1.35             | 1.36              | 1.35             | 1.36             | 1.36             | 1.37              | 1.36 |
| Sum of squares variance       | GLCM             | 1.35              | 1.38              | 1.36             | 1.36             | 1.37             | 1.35             | 1.36             | 1.35             | 1.35              | 1.35             | 1.36             | 1.36             | 1.36              | 1.36 |
| Cluster shade                 | GLCM             | 1.62              | 1.61              | 1.61             | 1.61             | 1.63             | 1.59             | 1.60             | 1.59             | 1.61              | 1.62             | 1.62             | 1.60             | 1.61              | 1.61 |
| Complexity                    | NGTDM            | 1.54              | 1.54              | 1.55             | 1.59             | 1.60             | 1.64             | 1.73             | 1.65             | 1.71              | 1.62             | 1.85             | 1.67             | 1.80              | 1.65 |
| Cluster prominence            | GLCM             | 1.71              | 1.68              | 1.71             | 1.70             | 1.71             | 1.68             | 1.68             | 1.68             | 1.70              | 1.71             | 1.70             | 1.68             | 1.70              | 1.70 |
| Busyness                      | NGTDM            | 1.32              | 1.50              | 1.51             | 1.59             | 1.66             | 1.60             | 1.87             | 1.51             | 1.87              | 1.58             | 2.25             | 1.71             | 2.16              | 1.70 |
| Zone size non-uniformity      | GLZSM            | 1.92              | 1.73              | 1.70             | 1.78             | 1.94             | 1.92             | 1.49             | 1.96             | 2.03              | 2.10             | 1.80             | 1.70             | 2.00              | 1.85 |
| Contrast                      | GLCM             | 2.06              | 2.10              | 2.07             | 2.04             | 2.04             | 2.04             | 2.01             | 2.11             | 2.06              | 2.05             | 2.07             | 2.08             | 2.06              | 2.06 |
| Difference variance           | GLCM             | 2.07              | 2.14              | 2.07             | 2.04             | 2.04             | 2.07             | 2.04             | 2.12             | 2.05              | 2.05             | 2.07             | 2.10             | 2.05              | 2.07 |
| Gray level non-uniformity     | GLZSM            | 2.03              | 2.08              | 2.11             | 2.16             | 2.15             | 2.18             | 2.31             | 2.18             | 2.30              | 2.21             | 2.41             | 2.28             | 2.37              | 2.21 |
| Large zone high gray emphasis | GLZSM            | 1.07              | 1.60              | 1.79             | 2.36             | 2.47             | 2.98             | 2.78             | 2.66             | 2.98              | 2.83             | 2.15             | 3.03             | 2.59              | 2.41 |
| Contrast                      | NGTDM            | 2.77              | 2.80              | 2.70             | 2.55             | 2.61             | 2.45             | 2.14             | 2.55             | 2.29              | 2.58             | 1.98             | 2.47             | 2.04              | 2.46 |
| Large zone size emphasis      | GLZSM            | 3.15              | 3.20              | 3.20             | 3.13             | 3.20             | 3.22             | 3.10             | 3.17             | 3.17              | 3.18             | 2.70             | 3.20             | 3.03              | 3.13 |
| Large zone low gray Emphasis  | GLZSM            | 3.19              | 3.24              | 3.24             | 3.20             | 3.25             | 3.25             | 3.22             | 3.24             | 3.25              | 3.24             | 3.04             | 3.24             | 3.19              | 3.21 |
| Mean RSD                      |                  | 1.15              | 1.16              | 1.17             | 1.18             | 1.20             | 1.21             | 1.22             | 1.22             | 1.23              | 1.23             | 1.23             | 1.23             | 1.26              |      |

**Supplemental TABLE 5:** Features sorted by decreasing ANOVA p value over voxel size 1, 2 and 4 mm feature subgroups. The subgroup mean COV trend is in reference to increasing voxel size (1 to 4 mm). Higher p values correspond to more similar resolution subgroups, indicating that the given feature is less dependent from resolution.

| Feature                       | Feature Category | P        | Trend |
|-------------------------------|------------------|----------|-------|
| Correlation                   | GLCM             | 1.000000 | -     |
| Sum variance                  | GLCM             | 0.995004 | ↓     |
| Cluster prominence            | GLCM             | 0.992275 | X     |
| Contrast                      | GLCM             | 0.991206 | X     |
| Difference variance           | GLCM             | 0.975632 | X     |
| Dissimilarity                 | GLCM             | 0.951504 | ↓     |
| Sum entropy                   | GLCM             | 0.950591 | ↓     |
| Auto correlation              | GLCM             | 0.922664 | X     |
| Information correlation       | GLCM             | 0.919974 | ↓     |
| Sum of squares variance       | GLCM             | 0.801710 | X     |
| Volume                        | Shape            | 0.710357 | X     |
| Inverse difference            | GLCM             | 0.676611 | X     |
| Inverse difference moment     | GLCM             | 0.652528 | X     |
| Sum average                   | GLCM             | 0.633000 | X     |
| High gray level zone emphasis | GLZSM            | 0.623499 | X     |
| Complexity                    | NGTDM            | 0.577589 | X     |
| Cluster shade                 | GLCM             | 0.257873 | ↓     |
| Small zone high gray emphasis | GLZSM            | 0.202858 | ↓     |
| Coarseness                    | NGTDM            | 0.055916 | X     |
| Texture strength              | NGTDM            | 0.033601 | ↓     |
| Spheric dice coefficient      | Shape            | 0.024423 | X     |
| Zone size non-uniformity      | GLZSM            | 0.014283 | ↓     |
| Difference entropy            | GLCM             | 0.008004 | ↓     |
| Gray level non-uniformity     | GLZSM            | 0.004777 | ↓     |
| Large zone high gray emphasis | GLZSM            | 0.003424 | ↓     |
| Entropy                       | GLCM             | 0.002774 | ↓     |
| Small zone size emphasis      | GLZSM            | 0.002068 | ↓     |
| Small zone low gray emphasis  | GLZSM            | 0.001958 | ↓     |
| Large zone size emphasis      | GLZSM            | 0.000972 | ↓     |
| Contrast                      | NGTDM            | 0.000830 | ↑     |
| Low gray level zone emphasis  | GLZSM            | 0.000672 | ↓     |
| Zone size percentage          | GLZSM            | 0.000634 | ↓     |
| Busyness                      | NGTDM            | 0.000127 | ↓     |
| Large zone low gray Emphasis  | GLZSM            | 0.000091 | ↓     |
| Maximum probability           | GLCM             | 0.000028 | X     |
| Angular second moment         | GLCM             | 0.000007 | ↓     |
| Compactness                   | Shape            | 5.42E-12 | ↑     |

**Supplemental TABLE 6:** Features sorted by decreasing ANOVA p value over bin size 0.01, 0.025, 0.05 and 0.1

feature subgroups. The subgroup mean COV trend is in reference to increasing bin size (0.01 to 0.1). Higher p values correspond to more similar bin size subgroups, indicating that the given feature is less dependent from binning.

| Feature                       | Feature Category | p        | Trend |
|-------------------------------|------------------|----------|-------|
| Compactness                   | Shape            | 1.000000 | -     |
| Spheric dice coefficient      | Shape            | 1.000000 | -     |
| Volume                        | Shape            | 1.000000 | -     |
| Correlation                   | GLCM             | 0.999978 | ↓     |
| Contrast                      | GLCM             | 0.999971 | ↑     |
| Cluster shade                 | GLCM             | 0.994648 | ↑     |
| Cluster prominence            | GLCM             | 0.993866 | ↑     |
| Dissimilarity                 | GLCM             | 0.991842 | ↑     |
| Difference variance           | GLCM             | 0.990493 | X     |
| Sum variance                  | GLCM             | 0.989194 | ↑     |
| Sum of squares variance       | GLCM             | 0.986295 | ↑     |
| Auto correlation              | GLCM             | 0.983679 | ↑     |
| Complexity                    | NGTDM            | 0.983275 | X     |
| Sum average                   | GLCM             | 0.964235 | ↑     |
| High gray level zone emphasis | GLZSM            | 0.553549 | X     |
| Zone size non-uniformity      | GLZSM            | 0.466191 | X     |
| Texture strength              | NGTDM            | 0.442112 | ↑     |
| Coarseness                    | NGTDM            | 0.131593 | X     |
| Maximum probability           | GLCM             | 0.128193 | ↑     |
| Contrast                      | NGTDM            | 0.100090 | ↓     |
| Angular second moment         | GLCM             | 0.096172 | ↑     |
| Small zone high gray emphasis | GLZSM            | 0.089241 | ↑     |
| Inverse difference moment     | GLCM             | 0.069921 | ↓     |
| Large zone high gray emphasis | GLZSM            | 0.025940 | ↑     |
| Busyness                      | NGTDM            | 0.021837 | ↑     |
| Inverse difference            | GLCM             | 0.019988 | ↓     |
| Low gray level zone emphasis  | GLZSM            | 0.004272 | ↑     |
| Sum entropy                   | GLCM             | 0.002355 | ↑     |
| Small zone low gray emphasis  | GLZSM            | 0.002262 | ↑     |
| Information correlation       | GLCM             | 0.002050 | ↑     |
| Difference entropy            | GLCM             | 0.000085 | ↑     |
| Gray level non-uniformity     | GLZSM            | 0.000044 | ↑     |
| Entropy                       | GLCM             | 0.000020 | ↑     |
| Large zone size emphasis      | GLZSM            | 0.000012 | ↑     |
| Large zone low gray Emphasis  | GLZSM            | 0.000006 | ↑     |
| Zone size percentage          | GLZSM            | 1.25E-07 | ↑     |
| Small zone size emphasis      | GLZSM            | 1.61E-08 | ↑     |



**Supplemental TABLE 7:** Features sorted by decreasing ANOVA p value over sphere 1-4 (S<sub>37</sub>-S<sub>17</sub>) subgroups. The subgroup mean COV trend is in reference to increasing volume (S<sub>17</sub> to S<sub>37</sub>). Higher p values correspond to more similar volume subgroups, indicating that the given feature is less dependent from volume.

| Feature                       | Feature Category | p        | Trend |
|-------------------------------|------------------|----------|-------|
| Large zone low gray Emphasis  | GLZSM            | 0.797472 | X     |
| Correlation                   | GLCM             | 0.680383 | ↓     |
| Large zone size emphasis      | GLZSM            | 0.482819 | ↓     |
| Zone size percentage          | GLZSM            | 0.449660 | ↓     |
| Small zone size emphasis      | GLZSM            | 0.273200 | ↓     |
| Coarseness                    | NGTDM            | 0.211454 | ↓     |
| Large zone high gray emphasis | GLZSM            | 0.138304 | ↓     |
| Small zone low gray emphasis  | GLZSM            | 0.110290 | X     |
| Low gray level zone emphasis  | GLZSM            | 0.065113 | X     |
| Information correlation       | GLCM             | 0.026789 | ↓     |
| Gray level non-uniformity     | GLZSM            | 0.014603 | X     |
| Compactness                   | Shape            | 0.013803 | ↓     |
| Zone size non-uniformity      | GLZSM            | 0.010271 | ↓     |
| Entropy                       | GLCM             | 0.004455 | ↓     |
| Contrast                      | NGTDM            | 0.001405 | ↓     |
| Maximum probability           | GLCM             | 0.000980 | ↓     |
| Angular second moment         | GLCM             | 0.000848 | ↓     |
| Busyness                      | NGTDM            | 0.000484 | X     |
| Difference entropy            | GLCM             | 0.000093 | ↓     |
| Small zone high gray emphasis | GLZSM            | 8.68E-10 | X     |
| Sum entropy                   | GLCM             | 3.30E-10 | ↓     |
| Inverse difference            | GLCM             | 2.23E-12 | ↓     |
| Texture strength              | NGTDM            | 1.74E-12 | ↓     |
| Spheric dice coefficient      | Shape            | 4.31E-14 | ↓     |
| Inverse difference moment     | GLCM             | 3.71E-14 | ↓     |
| Cluster shade                 | GLCM             | 1.06E-14 | X     |
| High gray level zone emphasis | GLZSM            | 8.84E-17 | ↓     |
| Complexity                    | NGTDM            | 7.38E-19 | X     |
| Sum average                   | GLCM             | 7.89E-30 | ↓     |
| Volume                        | Shape            | 2.11E-34 | ↓     |
| Sum of squares variance       | GLCM             | 1.42E-37 | ↓     |
| Auto correlation              | GLCM             | 3.17E-38 | ↓     |
| Difference variance           | GLCM             | 3.91E-40 | X     |
| Dissimilarity                 | GLCM             | 1.54E-43 | ↓     |
| Cluster prominence            | GLCM             | 9.95E-44 | ↓     |
| Contrast                      | GLCM             | 2.02E-49 | ↓     |
| Sum variance                  | GLCM             | 6.79E-52 | ↓     |



1. Papp L, Poetsch N, Grahovac M, et al. Glioma survival prediction with the combined analysis of in vivo <sup>11</sup>C-MET-PET, ex vivo and patient features by supervised machine learning. *J Nucl Med*. November 2017;jnumed.117.202267.
2. Hatt M, Tixier F, Pierce L, Kinahan PE, Le Rest CC, Visvikis D. Characterization of PET/CT images using texture analysis: the past, the present... any future? *Eur J Nucl Med Mol Imaging*. 2017;44:151-165.
3. Leijenaar RTH, Nalbantov G, Carvalho S, et al. The effect of SUV discretization in quantitative FDG-PET Radiomics: the need for standardized methodology in tumor texture analysis. *Sci Rep*. 2015;5:11075.
